# Supplementary material
Source: PubMed Central journal article supplement (PMC2268561)

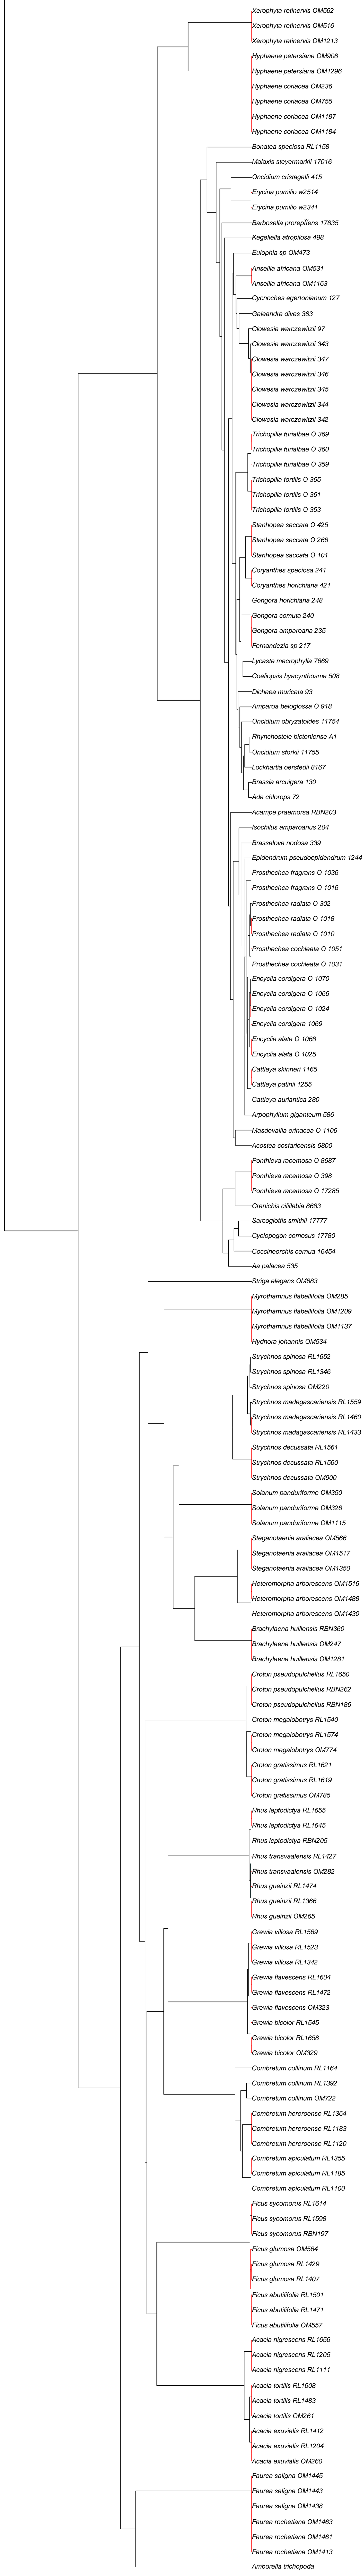

Supplement: pnas_0709936105_1.pdf [file pnas_0709936105_1.pdf]

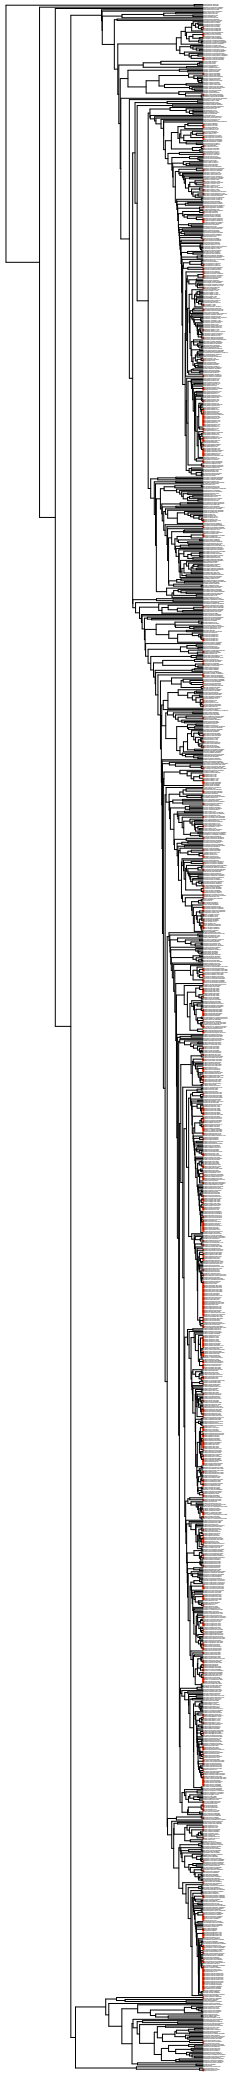

Supplement: pnas_0709936105_2.pdf [file pnas_0709936105_2.pdf]

A

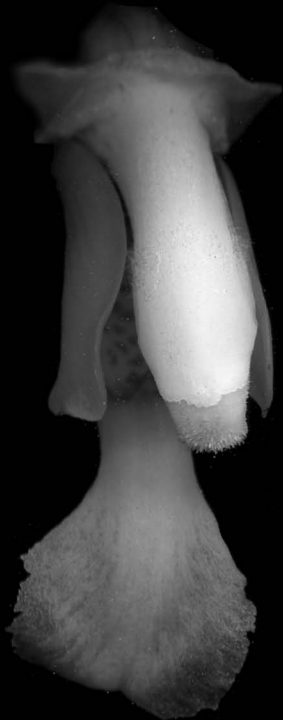

B

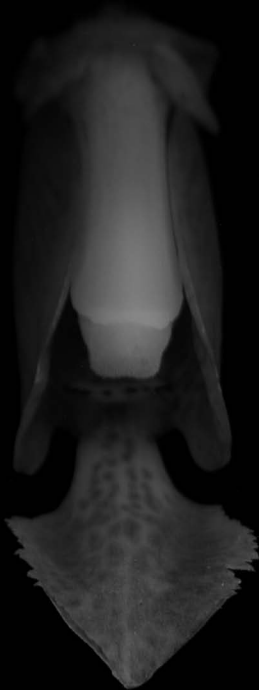

2 cm

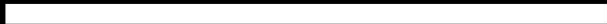

**A**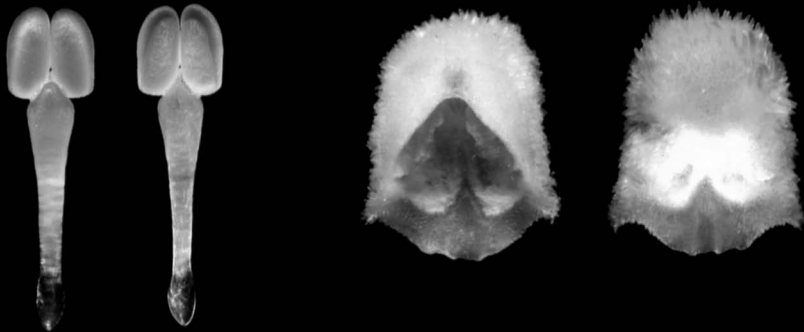**B**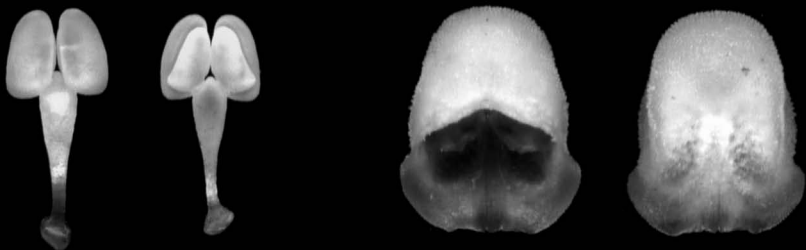

5 mm

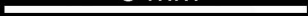

Supplement: pnas_0709936105_3.pdf [file pnas_0709936105_3.pdf]
